# Supplementary material for: Generation of a Gluconobacter oxydans knockout collection for improved extraction of rare earth elements
Source: PubMed Central journal article supplement (PMC8602642; doi:10.1038/s41467-021-27047-4), 2021-11-18
Supplement: 41467_2021_27047_MOESM1_ESM.pdf [file 41467_2021_27047_MOESM1_ESM.pdf]

**Supplementary Information For:**

**Generation of a *Gluconobacter oxydans* knockout collection for improved extraction of rare earth elements**

Alexa M. Schmitz<sup>1</sup>, Brooke Pian<sup>1</sup>, Sean Medin<sup>1</sup>, Matthew C. Reid<sup>2</sup>, Mingming Wu<sup>1</sup>, Esteban Gazel<sup>3</sup>, Buz Barstow<sup>1†</sup>

<sup>1</sup>Department of Biological and Environmental Engineering, Cornell University, Ithaca, NY 14853, USA

<sup>2</sup>School of Civil and Environmental Engineering, Cornell University, Ithaca, NY 14853, USA

<sup>3</sup>Department of Earth and Atmospheric Sciences, Cornell University, Ithaca, NY 14853, USA

†Corresponding author:

Buz Barstow, 228 Riley-Robb Hall, Cornell University, Ithaca, NY 14853; [bmb35@cornell.edu](mailto:bmb35@cornell.edu)

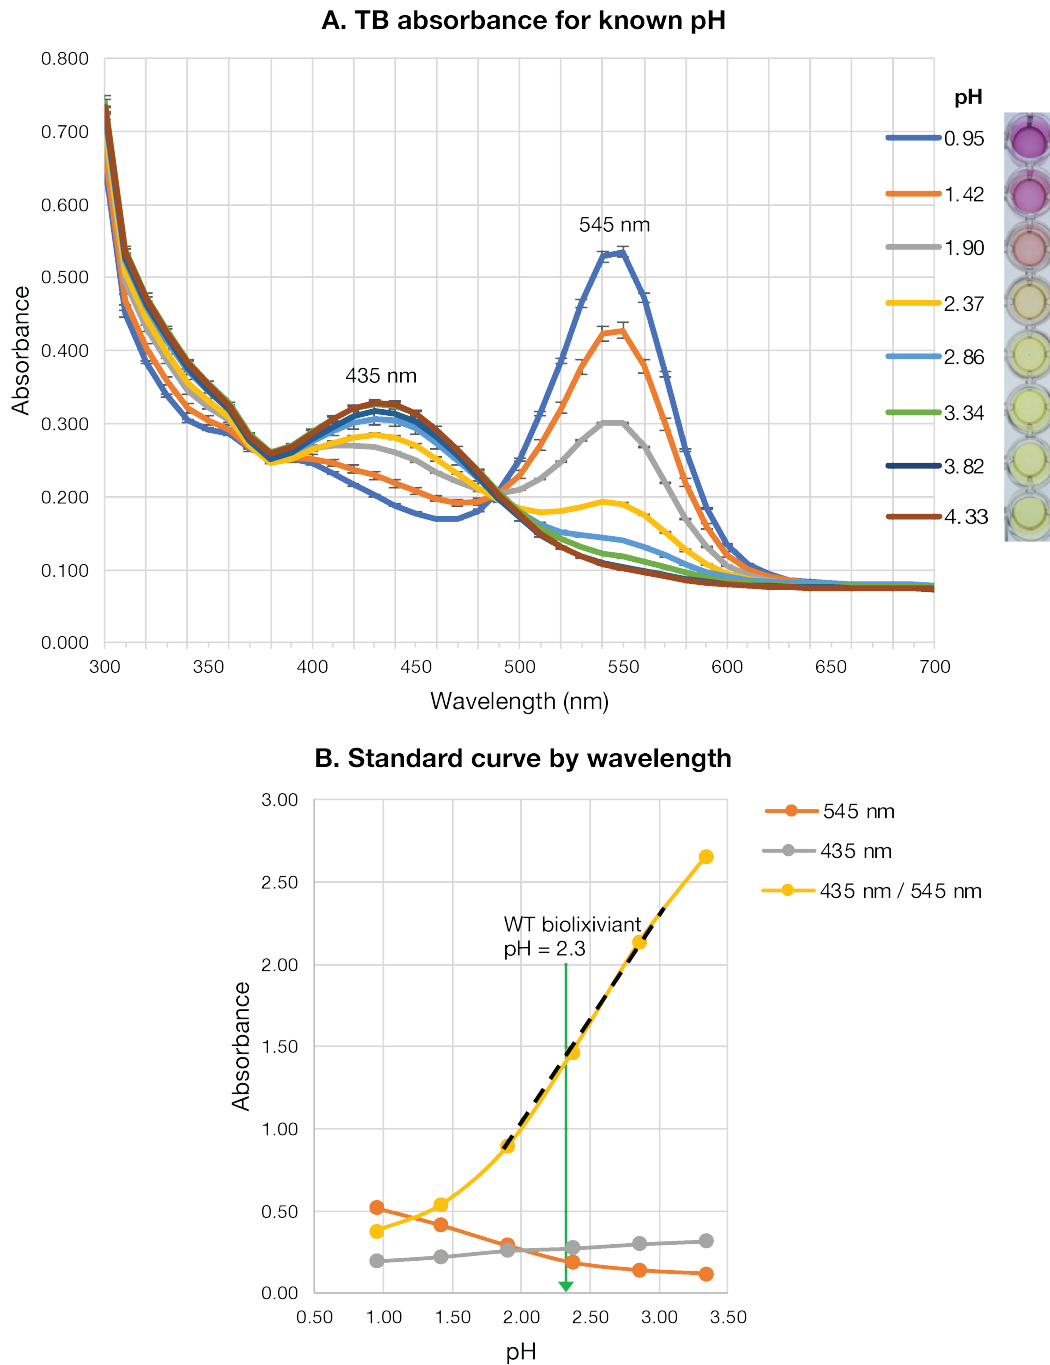

**Supplementary Figure 1.** Calibration data for Thymol Blue assay for media acidification. **(A)** Thymol Blue (TB) absorbance spectra for solutions of known pH. Error bars are standard deviation and  $n$  is 3 biological replicates. **(B)** Calibration curve to connect TB absorbance and pH. Black dashed line shows linearity of 435 nm / 545 nm between just below pH of 2.0 to a pH of 3.0. Green arrow indicates pH of the previously reported wild type *G. oxydans*-produced bioRxiviant.

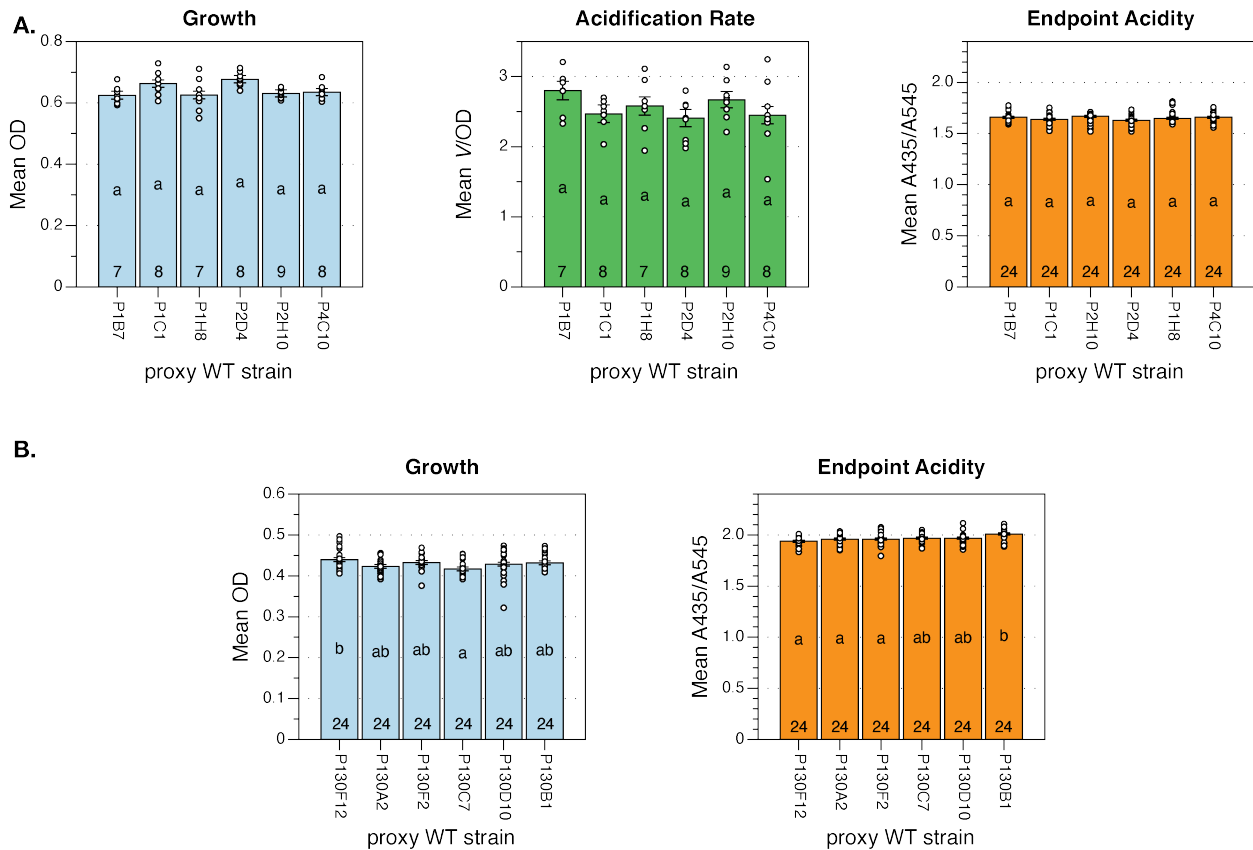

**Supplementary Figure 2.** Comparison of individual proxy WT disruption strains type A (**A**) and type B (**B**) growth (blue bars), initial acidification rate (green bars), and endpoint acidity (orange bars). Multiple comparisons were made for each set of proxy WT strains using the emmeans package in R with a Tukey  $p$ -value adjustment. Letters denote significance groups. Individual data points are shown as black circles. Error bars are standard error. The number of biological replicates for each strain measured for a particular phenotype is shown at the bottom of the corresponding bar.
